# Supplementary material for: The mating type locus protein MAT1-2-1 of Trichoderma reesei interacts with Xyr1 and regulates cellulase gene expression in response to light
Source: PubMed Central journal article supplement (PMC5725425; doi:10.1038/s41598-017-17439-2), 2017-12-11
Supplement: 41598_2017_17439_MOESM1_ESM.pdf [file 41598_2017_17439_MOESM1_ESM.pdf]

## **Supporting information**

# **The mating type locus protein MAT1-2-1 of *Trichoderma reesei* interacts with Xyr1 and regulates cellulase gene expression in response to light**

**Fanglin Zheng, Yanli Cao, Lei Wang, Xinxing Lv, Xiangfeng Meng, Weixin Zhang, Guanjun Chen, Weifeng Liu\***

No.27 Shanda South Road, State Key Laboratory of Microbial Technology, School of Life Science, Shandong University, Jinan 250100, Shandong, P. R. China;

Running title: MAT1-2-1 modulates cellulase gene expression

**Keywords:** MAT1-2-1; Xyr1; cellulase; light; *Trichoderma reesei*

Table S1 Primers for quantitative RT-PCR and ChIP used in this study.

| Primer name   | Sequences (5' to 3')      |
|---------------|---------------------------|
| mat1-2-1 qF   | ATCGTCACAATCTGGTCAAGGCT   |
| mat1-2-1 qR   | ATTGGTAGTCGGGATGCTTCTCA   |
| cbh1 qF       | CTTGGCAACGAGTTCCTT        |
| cbh1 qR       | TGTTGGTGGGATACTTGCT       |
| egl qF        | CGGCTACAAAAGCTACTACG      |
| egl qR        | CTGGTACTTGCGGGTGAT        |
| crt1 qF       | GATTCGGCGTCTCCATTG        |
| crt1 qR       | CGAGAACCAGAGAGTGTTG       |
| xyr1 qF       | GGTTGGACGACTGGATCT        |
| xyr1 qR       | GGTTGTCCCTCCATGATGTAG     |
| rpl6e qF      | CGTCATCGCCACCTCCTACAA     |
| rpl6e qR      | GCTGAAGGTGCTGGCGAGGTA     |
| Pcbh1-800 qF  | GGCAAGGGAAACCACCGAT       |
| Pcbh1-800 qR  | TGGACTGAGTGAAGAAACAAACG   |
| Pcbh1-200 qF  | CCTTCGGCCTTTGGGTGTA       |
| Pcbh1-200 qR  | TCTTTATCGGCTATTGTTCTTGG   |
| Pcbh1-100 qF  | TAGCCAAGAACAATAGCCGATAA   |
| Pcbh1-100 qR  | TTTCTGTGCCTCAAAAGATGGT    |
| Pcbh1-500 qF  | GGCAGTGATGGAAGACAGTGAAA   |
| Pcbh1-500 qR  | TCGTTCGTATCGGCAGACAAACCT  |
| Pcbh1-1000 qF | CCTCTTCTCAACCTTTGGCGTTTC  |
| Pcbh1-1000 qR | TCTACGAGCAGAGTTCCGGATAACA |
| Pcbh1-1400 qF | CGAACCCGGAGAATCGAGATGTGC  |
| Pcbh1-1400 qR | GCTACTGCGACGGAACGCTTTGCT  |
| Phpp1 qF      | GACGAGGACGACGAGGGCAAGA    |
| Phpp1 qR      | GCGCCAAAGTGAGCATTAAGGTAGG |
| Ppgg1 qF      | GCTTTGATCCGCGTGTATCTC     |
| Ppgg1 qR      | CGTATTGTGCCATCAGCGTCTT    |
| Phpr1 qF      | AAACCTGGTCGTGGAGATGCC     |
| Phpr1 qR      | AATAAGAAGCAGGACTCAGAACTCG |
| Phpr2 qF      | GCGACCTGCATTTAATCCCTT     |
| Phpr2 qR      | GGAATGGTAGGCTGAATCTGG     |

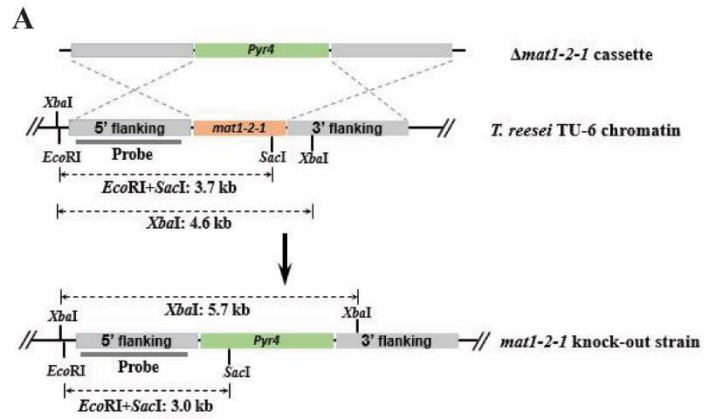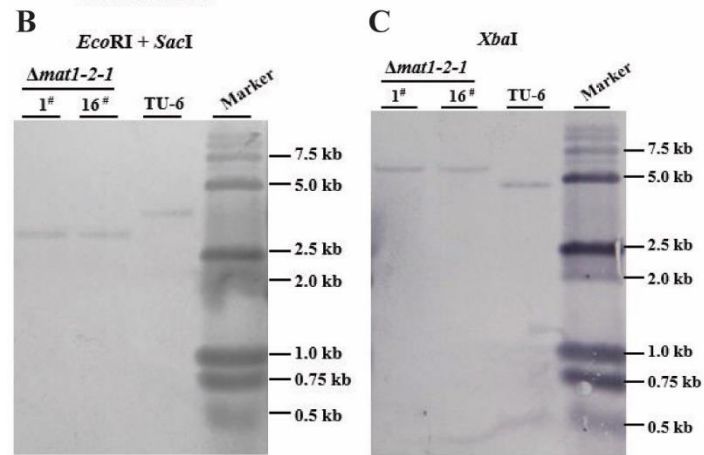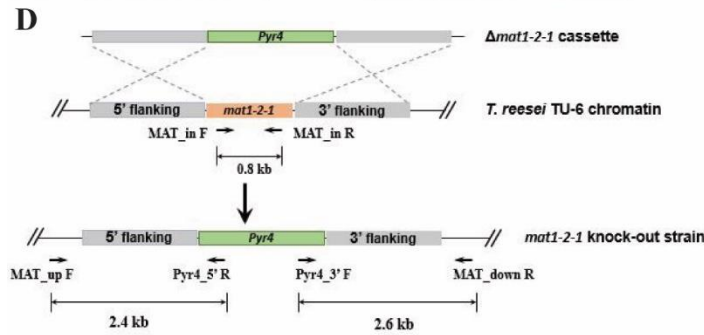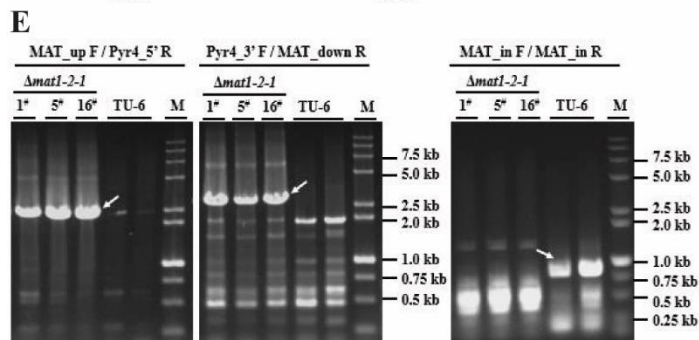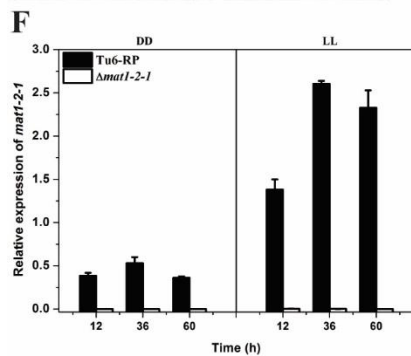

**Fig. S1 Verifying the  $\Delta mat1-2-1$  transformants by Southern blot (A-C), genomic PCR (D and E) and RT-qPCR (F). DD, constant darkness; LL, constant light.**

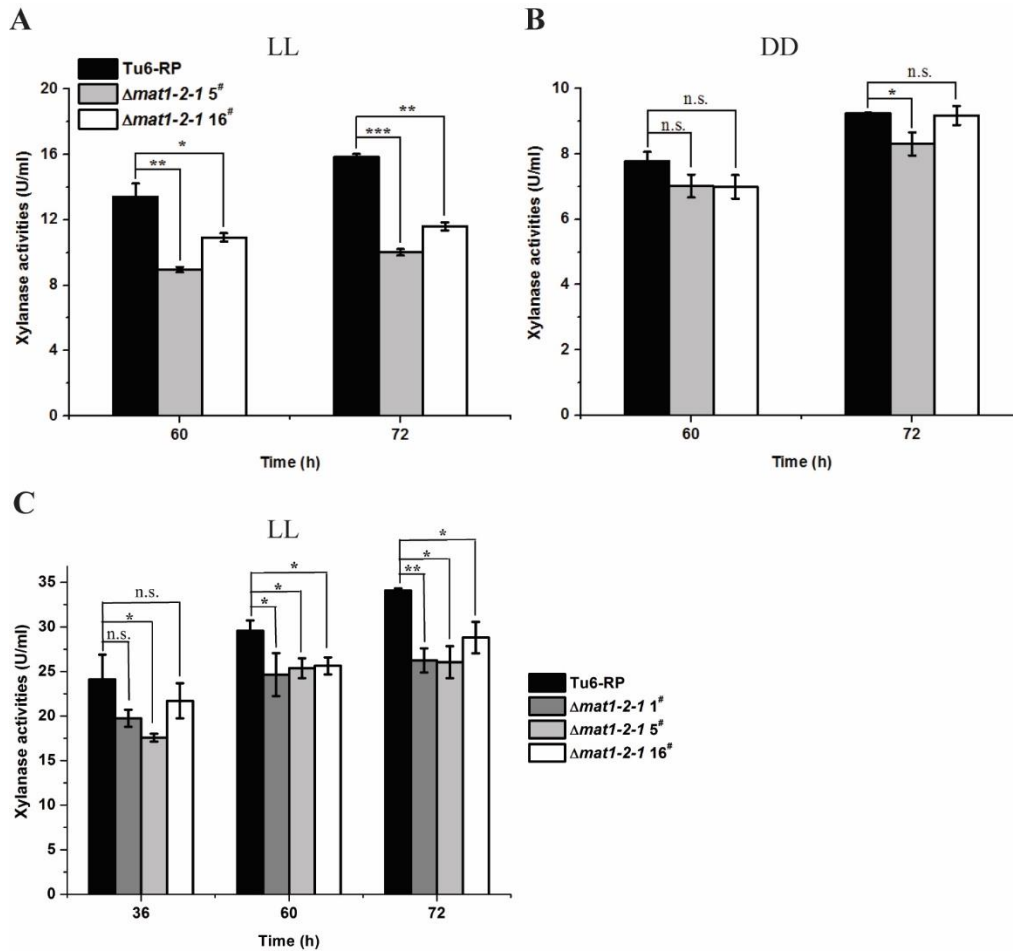

**Fig. S2 Deletion of  $mat1-2-1$  resulted in reduced xylanase activities on cellulose or xylan in light.** Xylan hydrolytic activities of the extracellular supernatant of two and three independent  $\Delta mat1-2-1$  transformants and TU6-RP strains induced on cellulose (A-B) or on xylan (C), respectively,

in light or darkness. (T-test, \*P<0.05, \*\*P<0.01, \*\*\*P<0.001, n.s. not significant)
